# Supplementary material for: Phenolic Profile, Antioxidant Activity and Amino Acid Composition of Moringa Leaves Fermented with Edible Fungal Strains
Source: MDPI journal article supplement (doi:10.3390/foods11233762), 2022-11-22
Supplement: s1 [file s1]

**Table S1.** The antioxidant potential of fermented moringa leaves as influenced by fungal strain and fermentation time.

|                                         | FCRS<br>(mg/g DM) | SA-ABTS <sup>•+</sup><br>(μmol trolox/g<br>DM) | SA- <sup>•</sup> OH<br>(IC <sub>50</sub> ) |
|-----------------------------------------|-------------------|------------------------------------------------|--------------------------------------------|
| Factor: strain                          |                   |                                                |                                            |
| <i>Rhizopus oryzae</i> CBS 372.63       | 31.25±7.14 d      | 345.77±70.27 c                                 | 0.90±0.08 a                                |
| <i>Rhizopus oligosporus</i> ATCC 64063  | 27.63±8.24 c      | 336.37±127.26 b                                | 1.09±0.15 b                                |
| <i>Aspergillus oryzae</i> CBS 673.92    | 26.14±7.19 b      | 337.09±128.64 b                                | 1.20±0.09 c                                |
| <i>Neurospora intermedia</i> CBS 131.92 | 25.67±8.80 a      | 283.93±69.11 a                                 | 1.11±0.17 b                                |
| Factor: time (days)                     |                   |                                                |                                            |
| 1                                       | 40.10±1.98 d      | 486.07±64.60 d                                 | 1.17±0.15 b                                |
| 3                                       | 26.26±4.01 c      | 296.69±36.40 c                                 | 1.02±0.18 a                                |
| 8                                       | 23.08±2.42 b      | 268.40±26.73 b                                 | 1.05±0.13 a                                |
| 16                                      | 21.24±3.03 a      | 251.99±34.12 a                                 | 1.07±0.18 a                                |

Two-factor analysis of variance and Fisher post-hoc test were applied. Data is shown as the mean ± SE. Mean values within a column followed by different letters differ significantly ( $p \leq 0.05$ ) within a factor. FCRS - Folin-Ciocalteu reacting substances; SA-ABTS<sup>•+</sup> - ABTS<sup>•+</sup>-scavenging activity; SA-<sup>•</sup>OH - <sup>•</sup>OH-scavenging activity; IC<sub>50</sub>: Half maximal inhibitory concentration.

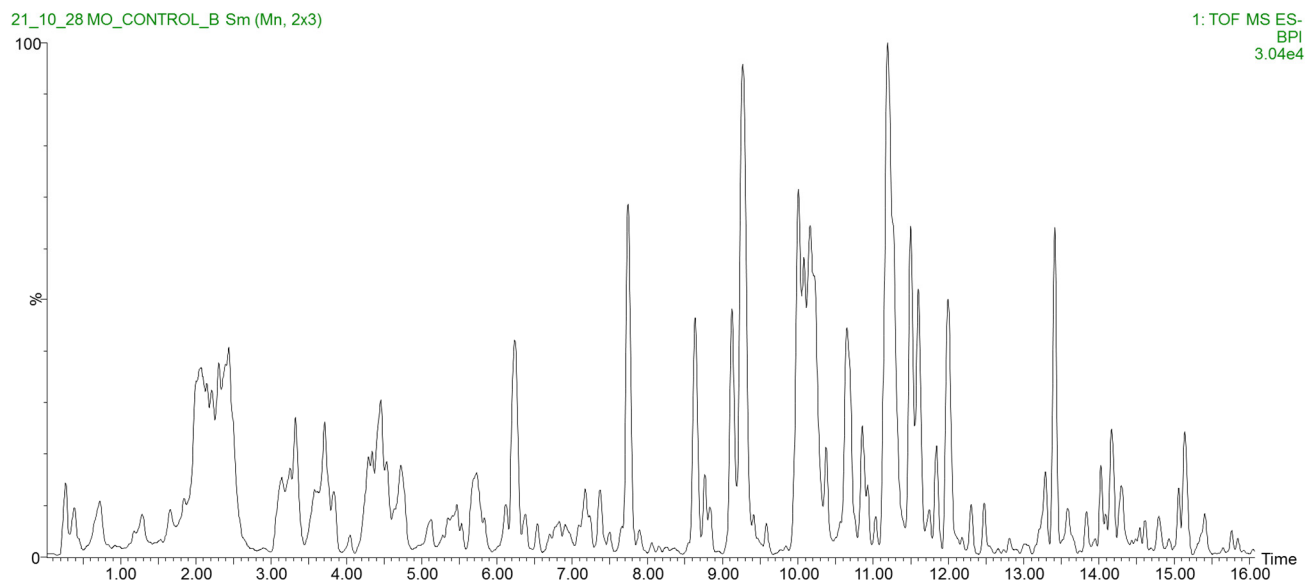

**Figure S1.** Base peak chromatogram of phenolic compounds analysed by HPLC-ESI-TOF-MS.

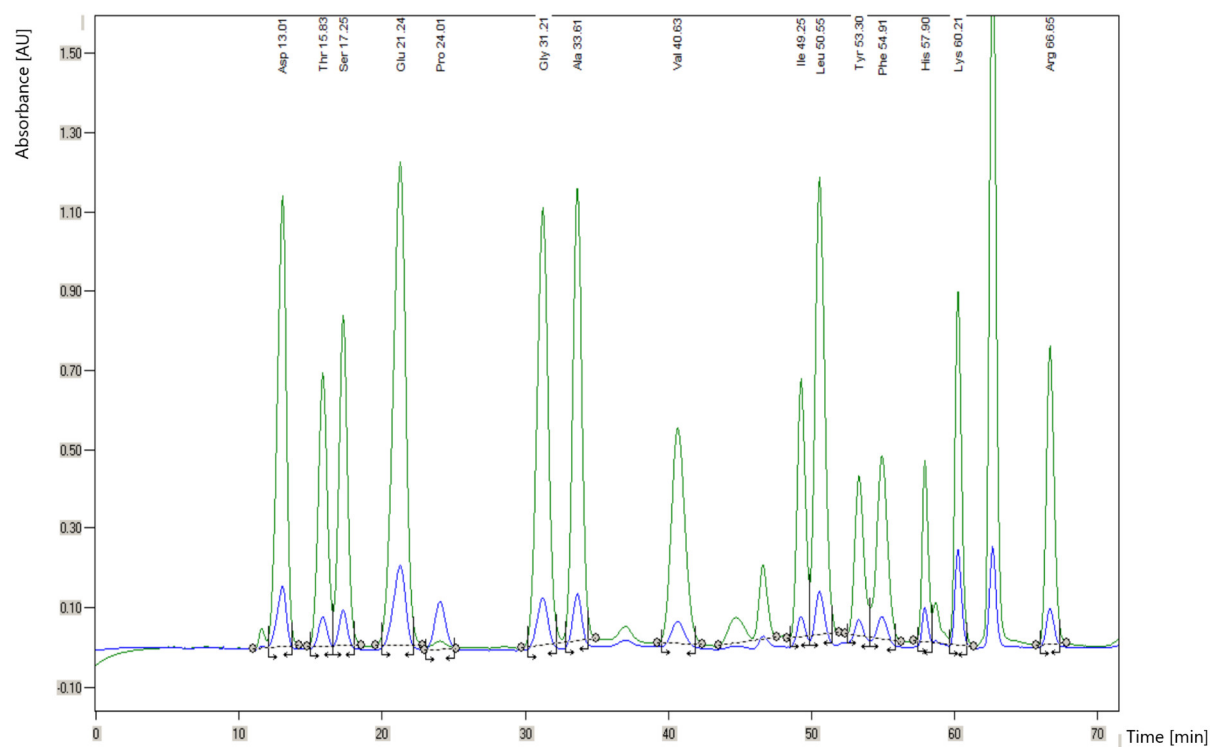

**Figure S2.** Representative chromatogram of amino acid analysis - moringa leaves fermented for 3 days with *Neurospora intermedia*. Green line - detection wavelength 570 nm, blue line - detection wavelength 440 nm.
